1  
2  
3  
4  
5  
6  
7  
8  
9  
10  
11  
12  
13  
14  
15  
16  
17  
18  
19  
20  
21  
22  
23

Trust in scientists and rates of noncompliance with a fisheries rule in the Brazilian Pantanal

Ethan A. Shirley<sup>1,#,\*</sup>, Meredith L. Gore<sup>1,&</sup>

<sup>1</sup> Department of Fisheries and Wildlife, Michigan State University, East Lansing, Michigan, United States of America

<sup>#</sup> Department of Earth and Environmental Science, University of Michigan, Ann Arbor, Michigan, United States of America

\* Corresponding author

E-mail: [ething@umich.edu](mailto:ething@umich.edu) (ES)

<sup>¶</sup> This author conducted research in the field, data analysis, and drafted this manuscript.

<sup>&</sup> This author helped formulate the idea for the project, obtain funding, and review this manuscript.

24 **Abstract**

25 Natural resource rules exist to manage resources and the people that interact with them. These  
26 rules often fail because people do not comply with them. Decisions to comply with natural  
27 resource rules often are based on attitudes about legitimacy of rules and the perceived risks of  
28 breaking rules. Trust in agencies promulgating rules in part may determine perceptions of  
29 legitimacy of the rule, and in turn depends on individuals' trust in different agency actors. The  
30 purpose of this research was to explore the relationship between fishing rule noncompliance and  
31 trust in scientists, a key group within management agencies. We interviewed 41 individuals in  
32 one rural fishing community in the Brazilian Pantanal from April to August, 2016, to assess (1)  
33 noncompliance rates, (2) noncompliance-related attitudes, and (3) the relationship between trust  
34 in scientists and noncompliance decisions in the region. We found that among study participants,  
35 noncompliance was common and overt. Trust in scientists performing research in the region was  
36 the best predictor of noncompliance rate with a fishing rule (nonparametric rank correlation  $\rho =$   
37  $-0.717$ ; Probit model pseudo- $R^2 = 0.241$ ). Baseline data from this research may help inform  
38 future interventions to minimize IUU fishing and protect the Pantanal fishery. Although our  
39 results are specific to one community in the Pantanal, trust in scientists is potentially an  
40 important factor for compliance decisions in similar situations around the world. These results  
41 build not only on compliance theory but also speak to the important role that many scientists play  
42 in the geographic areas in which they conduct their research.

43

44 **Keywords:** compliance, conservation criminology, enforcement, legitimacy, noncompliance,  
45 procedural justice, risk perception

46

## 47 **Introduction**

48 As human populations grow, they can increase pressure on the environment in which they live  
49 and the natural resources on which they rely (1,2). Environmental rules—such as laws,  
50 regulations, and social norms—exist to help mitigate risks associated with anthropogenic  
51 pressures. Unfortunately, the rules that exist to ensure the persistence of natural resources often  
52 fail to do so fully. Natural resource rules usually fail in one of two ways: they are poorly defined  
53 (i.e., even if everyone follows the rule, the natural resource will be exhausted because limits are  
54 inadequate); or, they are well defined but not followed (i.e., people do not always comply with  
55 the rule). Research on compliance and noncompliance therefore is important to examine failures  
56 of rules to manage human pressure on the environment. Oftentimes researchers and practitioners  
57 work to address noncompliance and compliance concomitantly (3–5). These dual-mission efforts  
58 continue despite recognition that within the context of conservation, motivations for compliance  
59 are not necessarily the inverse of those for noncompliance, or the violation of rules (6).  
60 Irrespective of divergent motivations of noncompliance and compliance, however, decreasing  
61 rates of intentional noncompliance can help overcome the second type of rule failure.

62 The case of illegal, unregulated, and unreported (IUU) describes failures of natural  
63 resource rules either by fishing in violation of them or in their absence. IUU fishing poses risks  
64 to fisheries and humans worldwide (7). In particular, IUU fishing poses risks to the size and  
65 composition of fish populations from overharvesting, risks to ecosystem health and function  
66 from degradation, and risks to humans from reduced income from tourism and professional  
67 fishing (7). This is significant because fisheries play a foundational role in sustaining healthy  
68 ecosystems and providing food security for billions of people worldwide (8). IUU fishing is  
69 increasingly recognized as a global high policy priority issue, with the United Nations, civil

70 society groups, nongovernmental organizations, and governments working, often together, to  
71 reduce its associated risks to both global fisheries and the billions of people that depend on them  
72 (9). Reducing noncompliance and thereby increasing rates of compliance, which is unintentional  
73 or intentional behavior in adherence with laws and rules (5), is one mechanism for reducing risks  
74 from IUU fishing.

75         The extant literature includes foundational insight into many answers for questions  
76 underlying noncompliance with IUU fishing. In a marine context, higher levels of risk of getting  
77 caught by surveillance can increase compliance rates by decreasing noncompliance with rules  
78 (10). However, surveillance and policing in rural and remote areas is often difficult and costly.  
79 Other lines of inquiry demonstrate perceived legitimacy of rules and rule makers are important  
80 factors influencing decisions to intentionally comply or not comply with laws (11–14). Attitudes  
81 about legitimacy can be intertwined with perceived risk (15). Risks to the environment can  
82 difficult for individuals to assess, and often perceptions of risks and causes of environmental  
83 degradation differ considerably between laypeople, rule makers, and scientists involved in  
84 setting rules. Questions remain about the suite of attitudes underlying individuals' decisions to  
85 comply or not comply with conservation-based rules. This gap in understanding widens when  
86 questions about compliance and IUU fishing are considered within the inland, freshwater fishing  
87 context. Inland fishing contexts may present distinct challenges from marine fisheries because  
88 they represent restricted habitats that are easier to access by private parties than many areas of  
89 the open ocean. The few studies that do focus on this area avoid inquiry about perceived  
90 environmental risks and legitimacy of rules (16). One meaningful gap between risk perception  
91 and legitimacy is trust, including trust in individuals associated with rulemaking agencies and the  
92 institutions that these individuals represent. Agencies and politicians are often geographically

93 far-removed from the natural resources they are responsible for managing, while scientists often  
94 work directly with natural resources and in the communities that use those resources (17). Trust  
95 in scientists may therefore represent an important part of certain people's noncompliance or  
96 compliance decisions.

97         In this work, we consider the case of inland IUU fishing in one community in the  
98 Brazilian Pantanal. In the Pantanal, a key region for conservation of biodiversity, scientists'  
99 research in rivers helps inform legal limits for fishing. At the same time, trust in science is  
100 thought to be decreasing (18,19). Our first objective was to assess noncompliance rates in the  
101 region. Our second objective was to gauge attitudes about risk and natural resource management  
102 in the region. Our third objective was to explore the relationship between trust in scientists, risk  
103 perception, and noncompliance. Our interdisciplinary approach reflects that of conservation  
104 criminology, or the integration of natural resource management, criminology, and risk and  
105 decision science (20). Enhanced knowledge about why people choose to violate rules can inform  
106 the design and evaluation of crime prevention programs and policies as well as law enforcement  
107 monitoring (6). The primary aim of this work is to build new knowledge that advances  
108 interventions to reduce IUU fishing in the Pantanal and help minimize risks to the fishery and  
109 people that interact with it.

110

### 111 **Conservation criminology: risk, trust, and natural resource management**

112         Conservation criminology, as the science of conservation crime, uses insights from the  
113 fields of risk and decision science, natural resource management, and criminology (20). This  
114 interdisciplinary approach offers one lens to understand human behavior associated with illegal  
115 natural resource use. Conservation criminology advises consideration of criminology to  
116 understand conservation behavior and violations of conservation rules. Criminologists

117 characterize intentional compliance with rules as being either coerced or voluntary. Coerced  
118 compliance generally relies heavily on policing and penalties for offenders (21,22), and it is on  
119 the manner of coercion (e.g., increasing detection or punishment; 23) that many criminologists  
120 focus. These coercion-based compliance studies look at external controls of behavior through  
121 fines and jail time for offenders who are caught (10, 21–23). Theoretically, people who calculate  
122 the risk of getting caught as being too high and the punishment too severe are deterred from  
123 engaging in noncompliant behavior (21). However, IUU fishing often occurs in regions where  
124 rule enforcement is not economically or physically viable. For example, areas in the middle of  
125 the open ocean can simply too vast to patrol closely and inland lakes can be surrounded by  
126 forests with unreliable ports of entry, inaccessible roads or other ingresses. In some instances,  
127 private landowners shield offenders from law enforcement authorities. Where coerced  
128 compliance is not viable, the natural resource management and risk and decision science parts of  
129 conservation criminology are especially valuable analytical tools.

130 Voluntary compliance is not coerced; instead, this type of compliance results from  
131 individual decisions to follow, rather than break, the rules, and has been the focus of more recent  
132 compliance work in the natural resources context (13). Approaching noncompliance with IUU  
133 rules through the lens of risk and decision science offers one way of studying voluntary  
134 compliance among individuals. Decisions to comply with or violate rules can be thought of as  
135 individuals' cost-benefit analyses, with costs differing depending on views about agency actors,  
136 the rules, and the environment itself cites. Behavioral decisions can be influenced by attitudes  
137 (see 24), and many attitudes are themselves influenced by the structure of natural resource  
138 management. Attitudes about fisheries conservation rules, including trust and legitimacy, can  
139 influence individuals' responses to those rules (25). Attitudes affect perceptions of risk (i.e.,

140 external cues are utilized based on internal attitudes) (26). Decisions under uncertainty are  
141 fundamentally different than cognitively simpler decisions with clear costs and benefits (27,28).  
142 In this instance, risk can be defined as the probability and the negative value—damage,  
143 associated with an action (29). Risk perception generally describes the intuitive judgments  
144 people make about risks as opposed to the technical assessments made by experts (30).  
145 Environmental risks can be particularly difficult to assess in decision-making processes because  
146 they are often uncertain and difficult to quantify (31). When people individually make decisions  
147 to harvest common pool natural resources such as fish, the damage they theoretically perceive  
148 themselves causing to the resource (i.e., the risk) is a fraction of the gain that they personally  
149 receive (1). Rules help clarify the acceptable levels of environmental risk, thus facilitating  
150 decision-making by identifying and quantifying damage that might otherwise not be readily  
151 apparent (31).

152 Finally, conservation criminology requires considering the natural resource dimensions of  
153 IUU fishing. Natural resource management (NRM) authorities, such as government agencies,  
154 help clarify risks by promulgating environmental rules. Empirical studies place attitudes relating  
155 to legitimacy of rules and of rule makers among the range of attitudes influencing compliance  
156 with laws (11,15,32). We know legitimacy is related to trust, or the willingness to accept  
157 vulnerability (33), and perceived procedural fairness in a NRM authority. Trust, perceived  
158 procedural fairness, and legitimacy have been suggested to affect compliance decisions (34,35).  
159 Trust in agencies is in part a function of trust in agents of the agency or rule makers as  
160 individuals (33). Trust depends in part on trustworthiness factors grouped by some authors into  
161 categories of identity, ability, benevolence, and integrity (36,37). Others have analyzed perceived  
162 procedural fairness, or fairness of the procedures behind creation and enforcement of laws and

163 rules, separately (38). The questions used in the literature to measure trust, procedural fairness,  
164 trustworthiness, and legitimacy are similar (39). Maximizing positive NRM outcomes such as  
165 successful sustainable use can be associated with increased or maintaining trust in management  
166 authorities (40). Trust helps explain why community-based natural resource management  
167 (CBNRM) can lead to more enduring, sustainable, and publicly accepted conservation outcomes  
168 over top-down natural resource decision-making by federal or state agencies (41). Conversely,  
169 lack of trust in natural resource authorities and agency contribute to delegitimizing the protective  
170 conservation measures promulgated by agencies, including rules. Without legitimate rules from  
171 trusted NRM agencies, people may perceive environmental risks differently than the agencies  
172 and be less consistent in their voluntary compliance.

173         The compelling relationship between trust in agencies and positive natural resource  
174 management outcomes has been explored in many different conservation contexts (33,34,42).  
175 Interestingly, although natural resource management occurs at different geographic scales (e.g.,  
176 local, national, transfrontier), trust is often measured at a single scale: managers and management  
177 (35). It is noteworthy then that studies exploring the relationship at the local scale, or between  
178 trust in scientists and noncompliance, do not exist in the literature, because many scientists do  
179 their work in the field often in or near communities impacted by natural resource rules.  
180 Considering the influence of trust at different scales may be especially important where rule  
181 makers are seen as outsiders imposing rules from a distant capital; considering trust in scientists,  
182 specifically, as part of the rulemaking authority, may be especially important in areas where  
183 scientists are actively and visibly involved in research. This situation is common in certain rural  
184 communities where scientists doing research on natural resources are seen as the local arm of



185 power-wielding agencies (17). To this end, we framed our exploration of trust and compliance at  
186 the level of the scientist.

187

### 188 **Study area: the Brazilian Pantanal and its fisheries management context**

189         The Pantanal is among the world’s largest wetlands (43), spanning 150,000 square  
190 kilometers in the center of South America and stretching over parts of Bolivia, Paraguay, and  
191 Brazil (Fig 1). The largest proportion of the Pantanal belongs to Brazil, where its rivers, lakes,  
192 forests, and savannas provide refuge for endangered species of fauna and an important migration  
193 stop for birds. The Pantanal drains part of the central Cerrado high plains of Brazil and its rivers  
194 feed into the De La Plata River basin before emptying into the Atlantic Ocean near Buenos Aires  
195 and Montevideo. The Pantanal is recognized as a key biodiversity area because of the role it  
196 plays in regional hydrology, collecting, filtering, and funneling water into the Paraguay-Paraná  
197 River system (44). It is also recognized as a key conservation area for its rich biodiversity,  
198 including endangered and threatened species like the hyacinth macaw (45). Despite its priority  
199 status, in Brazil the Pantanal’s lands are over ninety-percent privately owned (46); thus, private  
200 citizens’ compliance with existing environmental laws and rules is critical to its conservation.  
201 Thousands of people live in the Pantanal, sparsely distributed over the vast, seasonally-flooded  
202 mosaic of forests, rivers, and savannas. Enforcement efforts to maximize compliance with  
203 comprehensive environmental regulations are hampered by a lack of infrastructure, and their  
204 efficacy is not well understood because patterns of and motives for noncompliance have never  
205 been studied in the region.

206

207 **Fig 1. Map of the Brazilian Pantanal and research stations in regional context.** The

208 Brazilian Pantanal occupies parts of Mato Grosso and Mato Grosso do Sul within Brazil, and

209 borders Pantanal regions in Bolivia and Paraguay. Cities, towns, conservation units, lands set

210 aside for use by indigenous peoples, and approximate locations of some research stations within

211 the Pantanal. The community in this study is located outside of Poconé, some 150km from

212 Cuiabá, where monthly rulemaking meetings take place.

213 Conservation challenges in the Pantanal include IUU fishing (47). There are three types

214 of regulated fishing in the Pantanal: amateur, subsistence, and professional-artisanal (also called

215 just “professional”). Fishermen are organized into municipal fishermen’s colonies, which

216 function as an advocacy-type lobby representing fishermen’s rights in each municipality (48).

217 Many people who work as professional fishermen live in areas that are largely inaccessible to the

218 relatively small number of enforcement officers who have limited patrol resources and basic

219 levels of policing technology. In this regard, individual voluntary compliance with rules

220 especially important in the Pantanal (47). The organ responsible for setting the fishing rules for

221 all types of fishing in each state is called the Fishing Council, (*Conselho da Pesca*, or

222 CEPESCA), which involves a mixture of top-down and participatory co-management. In Mato

223 Grosso, it is composed of scientists from the local state and federal universities, representatives

224 from regulators at the State Secretary of the Environment (SEMA), and members of fishermen’s

225 colonies, along with legislators. CEPESCA defines laws and rules based on scientific research

226 and the needs of fishermen and other community members, who are free to contribute to public

227 debates and focus groups with legislators and others who draft the rules. The primary market fish

228 in the region are three siluriforms (catfish) and four characiforms (piranha-like fish), including

229 the pacu (*Piaractus mesopotaminus*) (47). CEPESCA regulates fishing in the region by creating  
230 a minimum size limit for each species and a weight limit depending on what type of fishing  
231 license fishermen possess (49).

232

### 233 **Methods: participants, instrument, and analysis**

#### 234 *Case study respondents*

235 We focused our inquiry on *in-loco* professional fishermen in the municipality of Poconé.  
236 *In-loco* professional fishermen in the region are a key stakeholder group with a vested interest in  
237 preserving the environment of the Pantanal for sustainable use. These professional fishermen live  
238 permanently on the banks of rivers and have for generations, and therefore have longstanding  
239 ties to the land and the sustainable harvest of resources in the region (50). Previous work with  
240 local fishermen sought to representatively sample the fishermen's colony as a single stakeholder  
241 group (48). However, as many as two-thirds of all professional fishermen live in cities and use  
242 their professional license to collect welfare during the spawning season when fishing is closed  
243 (51). We distinguished these two groups because of the possibility of their having different  
244 incentives to conserve the fishery—*in-loco* stakeholders have diverse ties to local natural  
245 resources that extend beyond the purely monetary.

246 The group of respondents for this study consisted of all the active professional fishermen  
247 belonging to Colony Z-11 living in one port community along the Cuiabá River in the Poconé  
248 municipality in between April and August, 2016. The community is sparsely distributed and not  
249 well delimited, so we considered for this study only the most densely populated region one-hour  
250 by speedboat upriver and downriver of the port. The lead author, fluent in Portuguese, visited  
251 every domicile and interviewed everyone found living on that part of the river and over the age

252 of 18; in this regard study respondents represent a good faith and complete subset of *in-loco*  
253 professional fishermen living in the community during the study period.

254

### 255 *Instrument design and implementation*

256 Our first objective was to assess noncompliance rates. Interview questions asked directly  
257 about people's perceptions of others' noncompliance rates in the community as well as their own  
258 noncompliance rates with a specific rule that was universally known to fishermen in the region.

259 Second, we focused on exploring the factors underlying noncompliance. We asked direct  
260 questions about why people think other people choose to violate rules. Then, we assessed  
261 attitudes about risk and trust as factors that impact noncompliance decisions. Attitudinal and risk  
262 questions were taken from the English literature, translated into Portuguese by the lead author  
263 and pretested with fishermen (n = 7) for construct validity and ease of understanding before they  
264 were included in the survey instrument. Trust and trustworthiness questions were replicated from  
265 (34) and (33), as well as (37). Questions were selected to represent aspects of trust and  
266 trustworthiness that elsewhere in the literature have been called procedural fairness (32,34).  
267 Environmental risk questions were derived from (52).

268 We used a voluntary questionnaire verbally administered face-to-face because most  
269 individuals within the target population were not literate and did not have reliable access to mail,  
270 internet, or land-line phones. The survey instrument began with a statement informing  
271 participants of the intent of the research, including ensuring participant confidentiality and  
272 researcher independence to mitigate effects of bias in responses (53). Following the statement of  
273 informed consent, we asked first general questions focusing on environmental attitudes following  
274 Gore et al. (52). We followed these questions with projective questions about noncompliance

275 rates and reasons (e.g., asking individuals to describe incidences of other people's  
276 noncompliance). Then, we asked a prospective question about noncompliance (i.e., inquiring  
277 about possible individuals' future rates of noncompliance). Both projective and prospective  
278 questions about noncompliance have been shown to reduce bias in responses about  
279 noncompliance (54). The single question about prospective personal noncompliance was placed  
280 at the end of the interview to minimize the effects of the social desirability bias (55).

281 Demographics were assessed following the completion of the substantive parts of the  
282 survey. The survey took approximately ten minutes to administer. All subjects' identities were  
283 protected and we did not ask their names. Michigan State University's Institutional Review  
284 Board, specifically the Human Subject Protection Program, was the ethics committee that  
285 reviewed and approved these methods exempt from review for the duration of the research (IRB  
286 x15-643e).

287

### 288 *Measurement and data analysis*

289 Attitudinal questions were measured on a five-point Likert-type scale (1 = "Disagree  
290 Completely" to 5 = "Completely Agree"). Noncompliance was assessed with a five-point  
291 frequency question (1 = "Never," 2 = "Rarely," 3 = "Sometimes," 4 = "Often," 5 = "All the  
292 time"), following questions asked in (56). For our first objective, we report proportions of each  
293 response to questions about community noncompliance rates and some notable correlations. For  
294 our second objective, we report proportions of each response to questions about perceptions of  
295 motivations behind noncompliance as well as means, medians, and standard deviations for  
296 attitudes and risk perceptions. A composite score of responses to trustworthiness and procedural  
297 fairness questions was created using the mean of responses. We report relevant Spearman's  $\rho$

298 rank-order correlations among attitude variables. For our third objective, we used Spearman's  
299 rho to measure rank-order correlation between independent variables and the dependent variable  
300 (future compliance with the pacu size rule). We report the ordered Probit regression model to  
301 describe the effect of trust in scientists, specifically, on frequency of noncompliance, and we  
302 speculate on why certain demographic variables also correlate with noncompliance rate. Data  
303 were analyzed in R3.4.4 (57).

304

## 305 **Results and discussion**

306 Forty-one respondents agreed to respond to be interviewed and three people refused to  
307 participate, resulting in a response rate of 93.2 percent. Of the respondents, the majority were  
308 men with two or more children, and fewer than half had finished primary school. Education level  
309 was inversely correlated with age ( $r = -0.46$ ) and years fishing ( $r = -0.28$ ). On average,  
310 participants were over 48 years old with more than 38 years of fishing experience. Most  
311 participants were unable to estimate their monthly income but all use fishing as their primary  
312 work during the open fishing season (March through September or October). During the closed  
313 season, they earned a monthly stipend from the government that was slightly above minimum  
314 wage. Although all participants lived within a 50-km radius of a scientific research station and  
315 were aware of scientist' work, few had interacted previously with scientists conducting research  
316 on the fisheries in the region (Table 1).

317

### 318 **Table 1. Demographics of participating *in-loco* professional fishermen in one fishing** 319 **community in the Pantanal.**

---

#### Participant Information

---

|                     |                    |
|---------------------|--------------------|
| Gender              | 34 Men, 7 Women    |
| Level of Education* | Mean 0.85, sd 1.06 |

|                                                 |                      |
|-------------------------------------------------|----------------------|
| Age                                             | Mean 48.09, sd 13.70 |
| Years Fishing                                   | Mean 38.44, sd 17.45 |
| Number of Children                              | Mean 3.05, sd 2.44   |
| Previous interaction with environmental police? | 38 Yes, 3 No         |
| Previous interaction with a scientist?          | 5 Yes, 36 No         |

320 <sup>a</sup> Levels of education: 0 = no education; 1 = some primary school; 2 = completed primary school;

321 3 = completed secondary school; 4 = completed tertiary education.

322

### 323 *1. Fisheries noncompliance rates*

324 Our first objective focused on assessing rates of noncompliance. We asked all study  
325 participants (n = 41) two questions about rates of compliance to assess views on the frequency of  
326 noncompliance in the community. Participants reported violations occurring frequently in the  
327 community. A majority (n = 25, 60.9%) agreed or agreed strongly that violations were common.  
328 In commentaries, participants accused amateur fishers without fishing licenses of violating the  
329 law the most. Most reported that they, personally, were usually compliant with the pacu catch  
330 size rule (34 or 85% indicated they would break the rule “sometimes,” “rarely,” or “never” in the  
331 coming year). A small minority of participants indicated they would break the rule all the time (n  
332 = 4, 9.7%); three participants reported breaking the rules often (7.3%) and six said they never  
333 would break the rules (14.6%). The average rate of self-reported future noncompliance among  
334 participants was 2.5, or between “rarely” and “sometimes.” The sentiment in the community of  
335 professional fishermen is that there are others—amateurs, professionals, and tourists—violating  
336 the fishing rules often, but virtually nobody identified themselves as part of the problem.  
337 Noncompliance rates correlated negatively with age ( $\rho = 0.22$ ) and positively with education  
338 level ( $\rho = 0.37$ ), which in turn correlated negatively with each other ( $\rho = 0.50$ ). Older, less  
339 educated people tended to comply with laws with a greater frequency than younger, more

340 educated people; this is in accordance with other studies that have found age to be a significant  
341 factor in determining compliance (58).

342 Our survey questions related to noncompliance were projective and prospective (asking  
343 about others' noncompliance and estimates of future noncompliance) to protect respondents from  
344 potential legal consequences of reporting their own past or present rule breaking. However, the  
345 idea that noncompliance with regulations is prevalent in the Pantanal is not particularly  
346 controversial, nor is the behavior particularly covert. This observation was amply supported by  
347 anecdotal evidence from community members and personal experiences by the lead author  
348 during the data collection period. Accounts contradicting the notion that noncompliance is  
349 prevalent and overt tend to focus on more severe forms of rule breaking (e.g., using nets to catch  
350 hundreds of pounds more than the permitted weight) compared with the relatively small violation  
351 on which we focused here (50). For example, the majority of undersized fish we observed were  
352 still adult fish, just not quite large enough to meet the size minima prescribed by law. This  
353 contrasts with violators who were intentionally fishing dourado, a protected species fish for  
354 which fishing is banned, for weeks at a time (observed in 2017), and with others who use fishing  
355 nets (observed in 2016) and dynamite (anecdote in 2016 in a different region of the Pantanal).  
356 Respondents, in their comments, highlighted these differences between their own noncompliance  
357 and the noncompliance of those who were truly damaging the environment, and frequently  
358 attributed the behavior of others to inherent bad character. Their comments provide evidence for  
359 the fundamental attribution error (59,60), which could suggest that due to correspondence bias  
360 people attribute their own behavior to external factors whereas behavior of others reflects  
361 internal flaws. This error has been shown to be a factor in environmental decisions of hunters  
362 and may be relevant in fishermen as well (61). Additional research would benefit this discourse.



363           Regardless of motive, the noncompliance rates studied here may or may not cause  
364 extreme environmental harm. The idea that more severe forms of noncompliance may be viewed  
365 differently is one that is also in keeping with the idea that professional fishermen have only a  
366 nominal negative impact on the environment. According to (62), overfishing is one of a bevy of  
367 factors causing harm in the Pantanal, and possibly less important when compared with  
368 environmental damage produced by sewage and other pollution, climatic changes, and damming  
369 of upstream tributaries. Even if instances of noncompliance are commonplace in the community  
370 of professional fishermen, it does not necessarily mean that they are the instigators of widespread  
371 environmental damage to the Pantanal. However, local people's cooperation with managers is  
372 necessary for successful management of the resource.

373

## 374 *2. Community perceptions of risk and management*

375           A range of motivations were presented as underlying noncompliance with fisheries rules,  
376 including lack of enforcement (n = 29, 70.7% agreed or agreed strongly that it was a factor) and  
377 lack of knowledge of rules (n = 3, 7.3% agreed or agreed strongly). When individuals were asked  
378 about their attitudes, most generally seemed aware of environmental problems and risks (Table  
379 2). Many negatively viewed aspects of the management structure and the procedural fairness in  
380 the region; however, most disagreed that the management agency was actively deceiving them.

381

382 **Table 2. Means, medians, and standard deviation of responses to Likert-type attitude**  
383 **questions focused on noncompliance with fisheries rules in the Brazilian Pantanal, April-**  
384 **August 2016.**

| Concept            | Question                   | Mean  | Median               | St. dev |
|--------------------|----------------------------|-------|----------------------|---------|
| Environmental risk | The fishery is in decline. | 4.341 | Completely agree (5) | 1.109   |

|                                                   |                                                      |       |              |       |
|---------------------------------------------------|------------------------------------------------------|-------|--------------|-------|
|                                                   | The decline is caused by humans.                     | 3.268 | Agree (4)    | 1.484 |
|                                                   | Breaking a rule is a big deal.                       | 3.732 | Agree (4)    | 1.225 |
| Enforcement risk                                  | Enforcement will catch me if I break the rule.       | 3.146 | Agree (4)    | 1.459 |
|                                                   | The fine is small, punishment not harsh.             | 3.537 | Agree (4)    | 1.362 |
| Trust in scientists                               | I trust scientists to help define rules.             | 2.707 | Neutral (3)  | 1.470 |
|                                                   | Management is successful in setting the right rules. | 2.610 | Neutral (3)  | 1.358 |
| Trustworthiness and procedural fairness attitudes | Management respects us.                              | 3.634 | Agree (4)    | 1.337 |
|                                                   | Management listens to us.                            | 2.220 | Disagree (2) | 1.295 |
|                                                   | Management has same values as us.                    | 3.098 | Neutral (3)  | 1.158 |
|                                                   | Management treats everyone equally.                  | 2.415 | Disagree (2) | 1.322 |
|                                                   | Management deceives us. <sup>a</sup>                 | 2.489 | Disagree (2) | 1.451 |
| Trustworthiness                                   | <i>Composite of above six attitudes</i>              | 2.915 | 3.00         | 0.847 |

385 <sup>a</sup> We subtracted Likert-type scores from 6 to score this question negatively for our analysis.

386

387           General attitudes about environmental risks among respondents in this study indicated an  
388 interest in the environment and its conservation. The majority of environmental attitude  
389 questions we asked respondents to provide are derived from those in the literature, and responses  
390 from a community that depends on natural resources for its livelihoods and subsistence is not  
391 surprising. Some individuals, however, indicated skepticism about whether humans are the ones  
392 causing environmental harm. This attitude was not correlated with any others but is notable—  
393 many who said the fishery is in a decline then suggested that it was primarily caused by the  
394 increasing population of piscivorous species such as the giant river otter (*Pteroneura*  
395 *brasiliensis*) and caiman (*Caiman yacare*). These species have been recovering from decimation  
396 in the late-20th century due to the pelt trade and are much more abundant than they were merely  
397 decades ago. Scientists tend to reject the contention that the recovery of predator populations has  
398 adversely affected the fishery, instead suggesting that healthier predator populations may  
399 actually protect fish stocks (63).

400           Respondents' attitudes about the natural resource management agency portrayed the  
401 institution in a mixed light. Although very few claimed that the managers were actively  
402 deceiving them, almost none seemed to think that they had sufficient voice to influence rules.

403 This is noteworthy given management in the Pantanal is designated as a co-management  
404 system—one in which stakeholders contribute to rulemaking decisions. However, the ability to  
405 contribute to the rulemaking decisions is limited to those who can travel some 50km to  
406 participate in fishermen’s colony meetings, or some 150km to participate in CEPESCA  
407 meetings. Furthermore, respondents augmented their responses about enforcement with  
408 anecdotes of how police sometimes invade their homes without a warrant. Views of risk of being  
409 caught for a violation were mixed—although a majority agreed or agreed completely (n = 24,  
410 58.5%) that if they violated a rule they would be caught, a majority (n = 26, 63.4%) also said that  
411 the penalty was relatively small. It was therefore unclear what sort of deterrent effect  
412 enforcement had in this region; however, age correlated positively with perceived chance of  
413 getting caught ( $\rho = 0.52$ ) and negatively with the penalty being small ( $\rho = -0.24$ ). This follows  
414 the logic of other noncompliance studies suggesting that older respondents are more risk averse  
415 (16).

416 In a situation like that in the Pantanal, wherein one commission consists of enforcers,  
417 researchers, and legislators, individuals’ views on the structure as a whole may depend on  
418 interactions with different parts. We measured trust by analyzing agency trustworthiness as well  
419 as asking about trust in scientists directly in an effort to differentiate between scientists and the  
420 rest of the management agency. This trust inquiry is not without complications. Trust has been  
421 defined in the literature as a function of trustworthiness and risk (37). Questions about  
422 procedural fairness and whether people have a voice in making rules are among those that are  
423 considered part of institutional trustworthiness in the literature. Trust, in Portuguese, is the same  
424 word as confidence (*confiança*), although some authors in the English literature have stressed the  
425 differences between these two constructs (64). In our study, trust in scientists correlated

426 moderately ( $\rho = 0.49$ ) with our agency trustworthiness composite score and with perceived  
427 success in the agency setting the rules ( $\rho = 0.34$ ). The success question comes from the *ability*  
428 subset of trustworthiness questions (37), as one would expect—people who trust the science  
429 behind rules trust the ability of the organization to set the right rules. All of these trust variables  
430 correlated positively with age and negatively with education level, bringing into question the  
431 reason for apparent less trust in scientists by the more educated in the community. The questions  
432 asked about institutional trust did not differentiate well between the different roles the agency  
433 plays—in addition to scientists, there are politicians and enforcement officers in CEPESCA, all  
434 of whom play a part in rulemaking, but none of whom singularly control the creation of each  
435 rule. It is possible that distrust in one group could be projected onto another group within the  
436 management structure. This is possibly the reason trust in scientists correlates only moderately  
437 with trust in the management agency as a whole. The questions did not consider the interactions  
438 people may have had with enforcement officers and how those interactions might have shaped  
439 trust in other agency members. Trust in scientists was also not differentiated here from trust in  
440 science, itself (19), which some studies have found to be in decline (65). Future research could  
441 differentiate between trust in science, trust in scientists, trust in police, trust in rule makers, and  
442 trustworthiness of the agency as both a rule maker and a rule enforcer.

443

### 444 *3. Factors contributing to individual noncompliance rates*

445 We focused our questions about the future noncompliance of the pacu size rule  
446 specifically to measure people's reasons for noncompliance. Level of education correlated  
447 positively with rate of noncompliance with this rule, and age and years fishing correlated  
448 negatively. Level of education also correlated negatively with trust and trustworthiness, while

449 age and years fishing correlated positively with trust and trustworthiness. Other authors have  
450 speculated that older people tended to comply more because they are more risk-averse and more  
451 involved in management decisions. Among the attitudes related to environmental risk,  
452 enforcement risk, management trustworthiness, and procedural fairness, only two measures  
453 significantly predicted frequency of noncompliance—trust in scientists to help define rules and  
454 the composite trustworthiness. Trust in scientists is the most predictive in an ordered Probit  
455 regression model (pseudo- $R^2$  0.241) of frequency of noncompliance. Multivariate models  
456 including enforcement risk as an alternative and independent factor in noncompliance did not  
457 return significant results; other univariate models with age and education level were less  
458 significant and far less predictive (pseudo- $R^2 < 0.05$ ) than trust and trustworthiness models.  
459 Nonparametric rank correlation tests returned similar results, with  $P < 0.001$  and a particularly  
460 high negative correlation between trust in scientists and noncompliance rates ( $\rho = -0.717$ ).

461 That respondents' trust in scientists affected stated rates of noncompliance with a rule  
462 influenced by empirical evidence reflects with parallel conclusions in the literature. Trust in  
463 management more generally, both in the form of procedural justice (38) and in institutional trust  
464 (34,42) has been shown in the literature to be related to compliance, although these studies focus  
465 on management as a whole, as opposed to researchers specifically. Trust in science and scientists  
466 also logically may be related to understanding of research, something that could in turn be  
467 related to education and age, depending on how educational opportunity has evolved through  
468 time. Age in this study was correlated with education level and years fishing, which were more  
469 reliable predictors of noncompliance rates. We found no evidence that enforcement risk or risk  
470 aversion play a part in compliance decisions in this region. Although in other contexts authors  
471 have argued that age is related to compliance because older people are more risk averse, in this

472 context it appears that age may be related to risk aversion and trust in management, but that only  
473 trust in management is predictive of noncompliance.

474

### 475 **Implications for natural resource management and conclusions**

476 This study set out to explore the human cognitions and behaviors underlying inland IUU  
477 fishing. Because rules exist to help mitigate risks associated with human pressure on the  
478 environment, decreasing rates of rule noncompliance can help maximize rule effect. We explored  
479 noncompliance in a context where compliance has understudied. We focused on attitudes that are  
480 rarely examined in a freshwater context, but which could be especially important to voluntary  
481 compliance due to remoteness and difficulty of enforcement. Although our study context was  
482 unique, it embodies conditions common in other key biodiversity areas around the world. Below,  
483 we discuss the implications of our findings for conservation criminology theory as well as the  
484 effective practice of natural resource management.

485 We found that in one community of Pantanal professional fishermen, noncompliance was  
486 overt and commonplace, a fact that we personally observed on many occasions. Although  
487 aspects like enforcement, procedural justice, and environmental risk can be important, the most  
488 important factor influencing noncompliance rate among the population of professional fishermen  
489 in this study group in the Pantanal was trust in the scientists helping to define the rules. Each  
490 violation of a rule is an example of IUU fishing, and although each violation may individually be  
491 small, the collective effect of violations can be large. There may be collateral effects of “small”  
492 transgressions of the rules, such as the promotion of a culture of violating rules and the lack of  
493 cooperation with enforcement and legislators to catch larger violators and write better rules. The  
494 exact amount of damage that violators of fishing rules cause is an empirical question not

495 addressed in this study. Thus, reducing all types and sizes of IUU fishing bears merit. Trust in  
496 scientists was a predictive factor for noncompliance decisions in our study community of  
497 fishermen in the Brazilian Pantanal. Increasing trust in scientists may be one mechanism for  
498 decreasing rates of noncompliance among our study population.

499 Building trust is known to be challenging. Davenport et al. (42) showed that in spite of  
500 clear indications that trust in management is necessary for success, a number of barriers exist to  
501 building trust, including lack of community engagement, knowledge gaps, and competing values.  
502 Many of these barriers appeared present in our study community. Very few of this study's  
503 participants had interacted with scientists in the past, potentially explaining a lack of mutual  
504 understanding and mismatching values. Rudolph & Riley (35) argued that gains in trust may be  
505 possible through changes in structure of procedural justice of the management system.  
506 Encouraging community members to share their voice can be critical for the success in a co-  
507 management system, and the fact that so many people in our case study group feel that  
508 management did not listen to their views highlights one opportunity for potential improvement. It  
509 is possible that more effective community engagement by scientists could help advance  
510 community members' understanding about their participatory rights in the management  
511 structure. This in turn might amplify positive perceptions of procedural justice of managers in  
512 the community. Future research would help explore these ideas further.

513 Trust in scientists is unlikely to be the primary driver of noncompliance decisions in  
514 every natural resource management system—our results are specific to one community in the  
515 Pantanal. However, a confluence of considerations from the case study group and Brazilian  
516 Pantanal may help explain the conditions under which trust in scientists may be more important  
517 than other factors. First, the community of professional fishermen in the Pantanal is not unlike

518 communities around the world in key biodiversity areas; it historically has had little access to  
519 education and there is a rift between the scientific elites doing research and creating laws and the  
520 local population. The extant literature demonstrates the value of using local people's knowledge  
521 and understanding of biological systems to improve the quality of scientific research in general  
522 (66), detailing a slew of specific benefits (67) for conservation worldwide (68) and in Brazilian  
523 fisheries in particular (69). The prolific influence of trust in scientists on frequency of  
524 noncompliance in this Pantanal community further underlines a different advantage of closing  
525 the gap of understanding between scientists and locals—that it may also result in more favorable  
526 conservation outcomes because of more consistent and widespread compliance with  
527 environmental rules.

528

## 529 **Acknowledgments**

530 We thank the Fulbright Scholars Program and all of those who contributed to the theoretical  
531 formulation of this project, including colleagues at Michigan State University and the Federal  
532 University of Mato Grosso, as well as the Pantanal fishermen who made this work enjoyable and  
533 whose rights and nature this work seeks to protect.

534

## 535 **References**

- 536 1. Hardin G. The Tragedy of the Commons. *Science*. 1968 Dec 13;162(3859):1243–8.
- 537 2. Malthus TR. *Population: the first essay*. Vol. 31. London; 1798.
- 538 3. Arias A. Understanding and managing compliance in the nature conservation context.  
539 *Journal of Environmental Management*. 2015 Apr;153:134–43.



- 540 4. Etienne J. Compliance theory: A goal framing approach. *Law & Policy*. 2011;33(3):305–  
541 333.
- 542 5. Winter SC, May PJ. Motivation for compliance with environmental regulations. *Journal of*  
543 *Policy Analysis and Management*. 2001;20(4):675–698.
- 544 6. Kahler JS, Gore ML. Beyond the cooking pot and pocket book: Factors influencing  
545 noncompliance with wildlife poaching rules. *International Journal of Comparative and*  
546 *Applied Criminal Justice*. 2012 May;36(2):103–20.
- 547 7. Shaver A, Yozell S. Casting a Wider Net: the security implications of illegal, unreported  
548 and unregulated fishing. [Internet]. Washington, D.C.: Stimson Center; 2018 [cited 2018  
549 Oct 19]. Available from: [https://www.stimson.org/sites/default/files/file-](https://www.stimson.org/sites/default/files/file-attachments/Casting%20a%20Wider%20Net%20Report.pdf)  
550 [attachments/Casting%20a%20Wider%20Net%20Report.pdf](https://www.stimson.org/sites/default/files/file-attachments/Casting%20a%20Wider%20Net%20Report.pdf)
- 551 8. Agnew DJ, Pearce J, Pramod G, Peatman T, Watson R, Beddington JR, et al. Estimating the  
552 worldwide extent of illegal fishing. *PloS one*. 2009;4(2):e4570.
- 553 9. FAO, editor. Economic growth is necessary but not sufficient to accelerate reduction of  
554 hunger and malnutrition. Rome: FAO; 2012. 60 p. (The state of food insecurity in the  
555 world).
- 556 10. Petrossian GA, Clarke RV. Explaining and Controlling Illegal Commercial Fishing: An  
557 Application of the CRAVED Theft Model. *British Journal of Criminology*. 2014 Jan  
558 1;54(1):73–90.

- 559 11. Hatcher A, Jaffry S, Thebaud O, Bennett E. Normative and Social Influences Affecting  
560 Compliance with Fishery Regulations. *Land Economics*. 2000 Aug;76(3):448.
- 561 12. Jagers SC, Berlin D, Jentoft S. Why comply? Attitudes towards harvest regulations among  
562 Swedish fishers. *Marine Policy*. 2012 Sep;36(5):969–76.
- 563 13. Moreto W, Gau J. Deterrence, Legitimacy, and Wildlife Crime in Protected Areas:  
564 Possibilities, Limitations, and Avenues for Future Scholarship. In: Gore ML, editor.  
565 *Conservation Criminology*. Wiley Blackwell; 2017.
- 566 14. Nielsen JR er, Mathiesen C. Important factors influencing rule compliance in fisheries  
567 lessons from Danish fisheries. 2001;
- 568 15. Tyler TR. Procedural Justice, Legitimacy, and the Effective Rule of Law. *Crime and*  
569 *Justice*. 2003;30:283–357.
- 570 16. Velez MA, Lopez MC. Rules Compliance and Age: Experimental Evidence with Fishers  
571 from the Amazon River. *Ecology and Society* [Internet]. 2013 [cited 2018 Mar 3];18(3).  
572 Available from: <http://www.ecologyandsociety.org/vol18/iss3/art10/>
- 573 17. Carter JG, Gore ML. Conservation Officers: A Force Multiplier for Homeland Security.  
574 *Journal of Applied Security Research*. 2013 Jul;8(3):285–307.
- 575 18. Hamilton LC, Hartter J, Saito K. Trust in Scientists on Climate Change and Vaccines.  
576 *SAGE Open*. 2015 Jul 10;5(3):215824401560275.
- 577 19. Millstone E, van Zwanenberg P. A crisis of trust: for science, scientists or for institutions?  
578 *Nature Medicine*. 2000 Dec;6(12):1307–8.

- 579 20. Gibbs C, Gore ML, McGarrell EF, Rivers L. Introducing Conservation Criminology:  
580 Towards Interdisciplinary Scholarship on Environmental Crimes and Risks. *British Journal*  
581 *of Criminology*. 2010 Jan 1;50(1):124–44.
- 582 21. Becker GS. Crime and punishment: An economic approach. In: *The economic dimensions*  
583 *of crime*. Springer; 1968. p. 13–68.
- 584 22. Nøstbakken L. Fisheries law enforcement—A survey of the economic literature. *Marine*  
585 *Policy*. 2008 May;32(3):293–300.
- 586 23. Leader-Williams N, Milner-Gulland EJ. Policies for the Enforcement of Wildlife Laws:  
587 The Balance between Detection and Penalties in Luangwa Valley, Zambia. *Conservation*  
588 *Biology*. 1993;7(3):611–7.
- 589 24. Ajzen I. From intentions to actions: a theory of planned behavior. In: Kuhl J, Beckmann,  
590 editors. *Action control: from cognition to behavior*. New York: Springer-Verlag; 1985.
- 591 25. Ajzen I, Fishbein M. *Understanding attitudes and predicting social behaviour*. 1980;
- 592 26. Brunswik E. The conceptual framework of psychology. *Psychological Bulletin*.  
593 1952;49(6):654–656.
- 594 27. Tversky A, Kahneman D. Loss Aversion in Riskless Choice: A Reference-Dependent  
595 Model. *The Quarterly Journal of Economics*. 1991 Nov 1;106(4):1039–61.
- 596 28. Tversky A, Kahneman D. The Framing of Decisions and the Psychology of Choice.  
597 *Science*. 1981;211(4481):453–8.

- 598 29. Kaplan S, Garrick BJ. On the quantitative definition of risk. *Risk analysis*. 1981;1(1):11–  
599 27.
- 600 30. Slovic P. Perception of Risk. *Science*. 1987;236(4799):280–5.
- 601 31. Lazarus RJ. Restoring What’s Environmental About Environmental Law in the Supreme  
602 Court. *Ucla L Rev*. 1999;47:703.
- 603 32. Tyler TR, Bies RJ. Beyond formal procedures: The interpersonal context of procedural  
604 justice. *Applied social psychology and organizational settings*. 1990;77:98.
- 605 33. Sharp E, Curtis A. Can NRM agencies rely on capable and effective staff to build trust in  
606 the agency? *Australasian Journal of Environmental Management*. 2014 Jul 3;21(3):268–80.
- 607 34. Hamm JA, PytlikZillig LM, Herian MN, Tomkins AJ, Dietrich H, Michaels S. Trust and  
608 Intention to Comply with a Water Allocation Decision: The Moderating Roles of  
609 Knowledge and Consistency. *Ecology and Society* [Internet]. 2013 [cited 2018 Mar  
610 3];18(4). Available from: <http://www.ecologyandsociety.org/vol18/iss4/art49/>
- 611 35. Rudolph BA, Riley SJ. Factors Affecting Hunters’ Trust and Cooperation. *Human*  
612 *Dimensions of Wildlife*. 2014 Sep 3;19(5):469–79.
- 613 36. Mayer RC, Davis JH. The effect of the performance appraisal system on trust for  
614 management: A field quasi-experiment. *Journal of applied psychology*. 1999;84(1):123.
- 615 37. Mayer RC, Davis JH, Schoorman FD. An Integrative Model of Organizational Trust. *The*  
616 *Academy of Management Review*. 1995;20(3):709–34.

- 617 38. Sunshine J, Tyler TR. The Role of Procedural Justice and Legitimacy in Shaping Public  
618 Support for Policing. *Law & Society Review*. 2003;37(3):513–48.
- 619 39. Hough M, Jackson J, Bradford B, Myhill A, Quinton P. Procedural Justice, Trust, and  
620 Institutional Legitimacy. *Policing*. 2010 Aug 1;4(3):203–10.
- 621 40. Dietz T, Ostrom E, Stern PC. The Struggle to Govern the Commons. *Science*.  
622 2003;302(5648):1171–1171.
- 623 41. Ostrom E, Cox M. Moving beyond panaceas: a multi-tiered diagnostic approach for social-  
624 ecological analysis. *Environmental Conservation*. 2010 Dec;37(04):451–63.
- 625 42. Davenport MA, Leahy JE, Anderson DH, Jakes PJ. Building Trust in Natural Resource  
626 Management Within Local Communities: A Case Study of the Midewin National Tallgrass  
627 Prairie. *Environmental Management*. 2007 Mar;39(3):353–68.
- 628 43. Keddy PA, Fraser LH, Solomeshch AI, Junk WJ, Campbell DR, Arroyo MTK, et al. Wet  
629 and Wonderful: The World’s Wetlands are Conservation Priorities. *Bioscience*.  
630 2009;59(1):39–51.
- 631 44. Gonçalves HC, Mercante MA, Santos ET. Hydrological cycle. *Brazilian Journal of*  
632 *Biology*. 2011;71(1):241–253.
- 633 45. Junk WJ, da Cunha CN, Wantzen KM, Petermann P, Strüssmann C, Marques MI, et al.  
634 Biodiversity and its conservation in the Pantanal of Mato Grosso, Brazil. *Aquatic Sciences*.  
635 2006 Oct;68(3):278–309.

- 636 46. Junk WJ, da Cunha CN. Pantanal: a large South American wetland at a crossroads.  
637 Ecological Engineering. 2005 Apr;24(4):391–401.
- 638 47. Mateus L, Penha JM, Petrere M. Fishing resources in the rio Cuiabá basin, Pantanal do  
639 Mato Grosso, Brazil. Neotropical Ichthyology. 2004;2(4):217–227.
- 640 48. Tocantins N, Rossetto OC, Borges FR. Abordagem socioeconômica dos pescadores  
641 filiados à colônia Z11: município de Poconé, Pantanal de Mato Grosso, Brasil. Revista  
642 Geográfica de América Central. 2011;2:1–9.
- 643 49. Lei No. 9.096 de 16/1/2009, DOEMT de 16.1.2009 [Internet]. Available from:  
644 <https://www.legisweb.com.br/legislacao/?id=133482>
- 645 50. Chiaravalloti R. Overfishing or Over Reacting? Management of Fisheries in the Pantanal  
646 Wetland, Brazil. Conservation and Society. 2017;15(1):111.
- 647 51. Relatório De Avaliação Da Execução De Programa De Governo Nº 70 Fiscalização E  
648 Monitoramento Para A Sustentabilidade Dos Recursos Aquícolas E Pesqueiros. Cgu --  
649 Ministério Da Transparência, Fiscalização E Controladoria-Geral Da União; 2017 p. 63.  
650 Report No.: 70.
- 651 52. Gore ML, Knuth BA, Curtis PD, Shanahan JE. Stakeholder perceptions of risk associated  
652 with human–black bear conflicts in New York’s Adirondack Park campgrounds:  
653 implications for theory and practice. Wildlife Society Bulletin. 2006;34(1):36–43.
- 654 53. Gavin MC, Solomon JN, Blank SG. Measuring and Monitoring Illegal Use of Natural  
655 Resources. Conservation Biology. 2010 Feb;24(1):89–100.

- 656 54. Fisher RJ. Social desirability bias and the validity of indirect questioning. *Journal of*  
657 *consumer research*. 1993;20(2):303–315.
- 658 55. Catania JA, Binson D, Canchola J, Pollack LM, Hauck W. Effects of Interviewer Gender,  
659 Interviewer Choice, and Item Wording on Responses to Questions Concerning Sexual  
660 Behavior. *The Public Opinion Quarterly*. 1996;60(3):345–75.
- 661 56. Kuperan K, Sutinen JG. Blue Water Crime: Deterrence, Legitimacy, and Compliance in  
662 Fisheries. *Law & Society Review*. 1998;32(2):309.
- 663 57. R Foundation for Statistical Computing, 2018 [Internet]. [cited 2018 Sep 10]. Available  
664 from: <https://cran.r-project.org/bin/windows/base/>
- 665 58. Madrigal-Ballesteros R, Schlüter A, Claudia Lopez M. What makes them follow the rules?  
666 Empirical evidence from turtle egg harvesters in Costa Rica. *Marine Policy*. 2013  
667 Jan;37:270–7.
- 668 59. Jones EE, Harris VA. The attribution of attitudes. *Journal of Experimental Social*  
669 *Psychology*. 1967 Jan;3(1):1–24.
- 670 60. Ross L. The Intuitive Psychologist And His Shortcomings: Distortions in the Attribution  
671 Process. In: *Advances in experimental social psychology* [Internet]. Academic Press; 1977  
672 [cited 2018 Apr 7]. p. 173–220. Available from:  
673 [http://web.mit.edu/curhan/www/docs/Articles/15341\\_Readings/Social\\_Cognition/Ross\\_Int](http://web.mit.edu/curhan/www/docs/Articles/15341_Readings/Social_Cognition/Ross_Intuitive_Psychologist_in_Adv_Experiment_Soc_Psych_vol10_p173.pdf)  
674 [uitive\\_Psychologist\\_in\\_Adv\\_Experiment\\_Soc\\_Psych\\_vol10\\_p173.pdf](http://web.mit.edu/curhan/www/docs/Articles/15341_Readings/Social_Cognition/Ross_Intuitive_Psychologist_in_Adv_Experiment_Soc_Psych_vol10_p173.pdf)

- 675 61. Kuentzel WF. Skybusting and the Slob Hunter Myth. *Wildlife Society Bulletin* (1973-  
676 2006). 1994;22(2):331–6.
- 677 62. Mateus LAF, Penha JMF. Dinâmica populacional de quatro espécies de grandes bagres na  
678 bacia do rio Cuiabá, Pantanal norte, Brasil (Siluriformes, Pimelodidae). *Revista Brasileira*  
679 *de Zoologia*. 2007 Mar;24(1):87–98.
- 680 63. Peres CA, Carkeek AM. How caimans protect fish stocks in western Brazilian Amazonia –  
681 a case for maintaining the ban on caiman hunting. *Oryx*. 1993 Oct;27(04):225.
- 682 64. Cao L. Differentiating confidence in the police, trust in the police, and satisfaction with the  
683 police. *Policing: An International Journal of Police Strategies & Management*. 2015 May  
684 18;38(2):239–49.
- 685 65. Haerlin B, Parr D. How to restore public trust in science. *Nature*. 1999  
686 Aug;400(6744):499–499.
- 687 66. Huntington HP. Using Traditional Ecological Knowledge in Science: Methods and  
688 Applications. *Ecological Applications*. 2000;10(5):1270–4.
- 689 67. Gilchrist G, Mallory M, Merkel F. Can Local Ecological Knowledge Contribute to Wildlife  
690 Management? Case Studies of Migratory Birds. *Ecology and Society* [Internet]. 2005 [cited  
691 2018 Sep 9];10(1). Available from: <https://www.jstor.org/stable/26267752>
- 692 68. Brook RK, McLachlan SM. Trends and prospects for local knowledge in ecological and  
693 conservation research and monitoring. *Biodiversity and Conservation*. 2008  
694 Dec;17(14):3501–12.



- 695 69. Gerhardinger LC, Godoy EAS, Jones PJS. Local ecological knowledge and the  
696 management of marine protected areas in Brazil. *Ocean & Coastal Management*. 2009  
697 Mar;52(3–4):154–65.

698

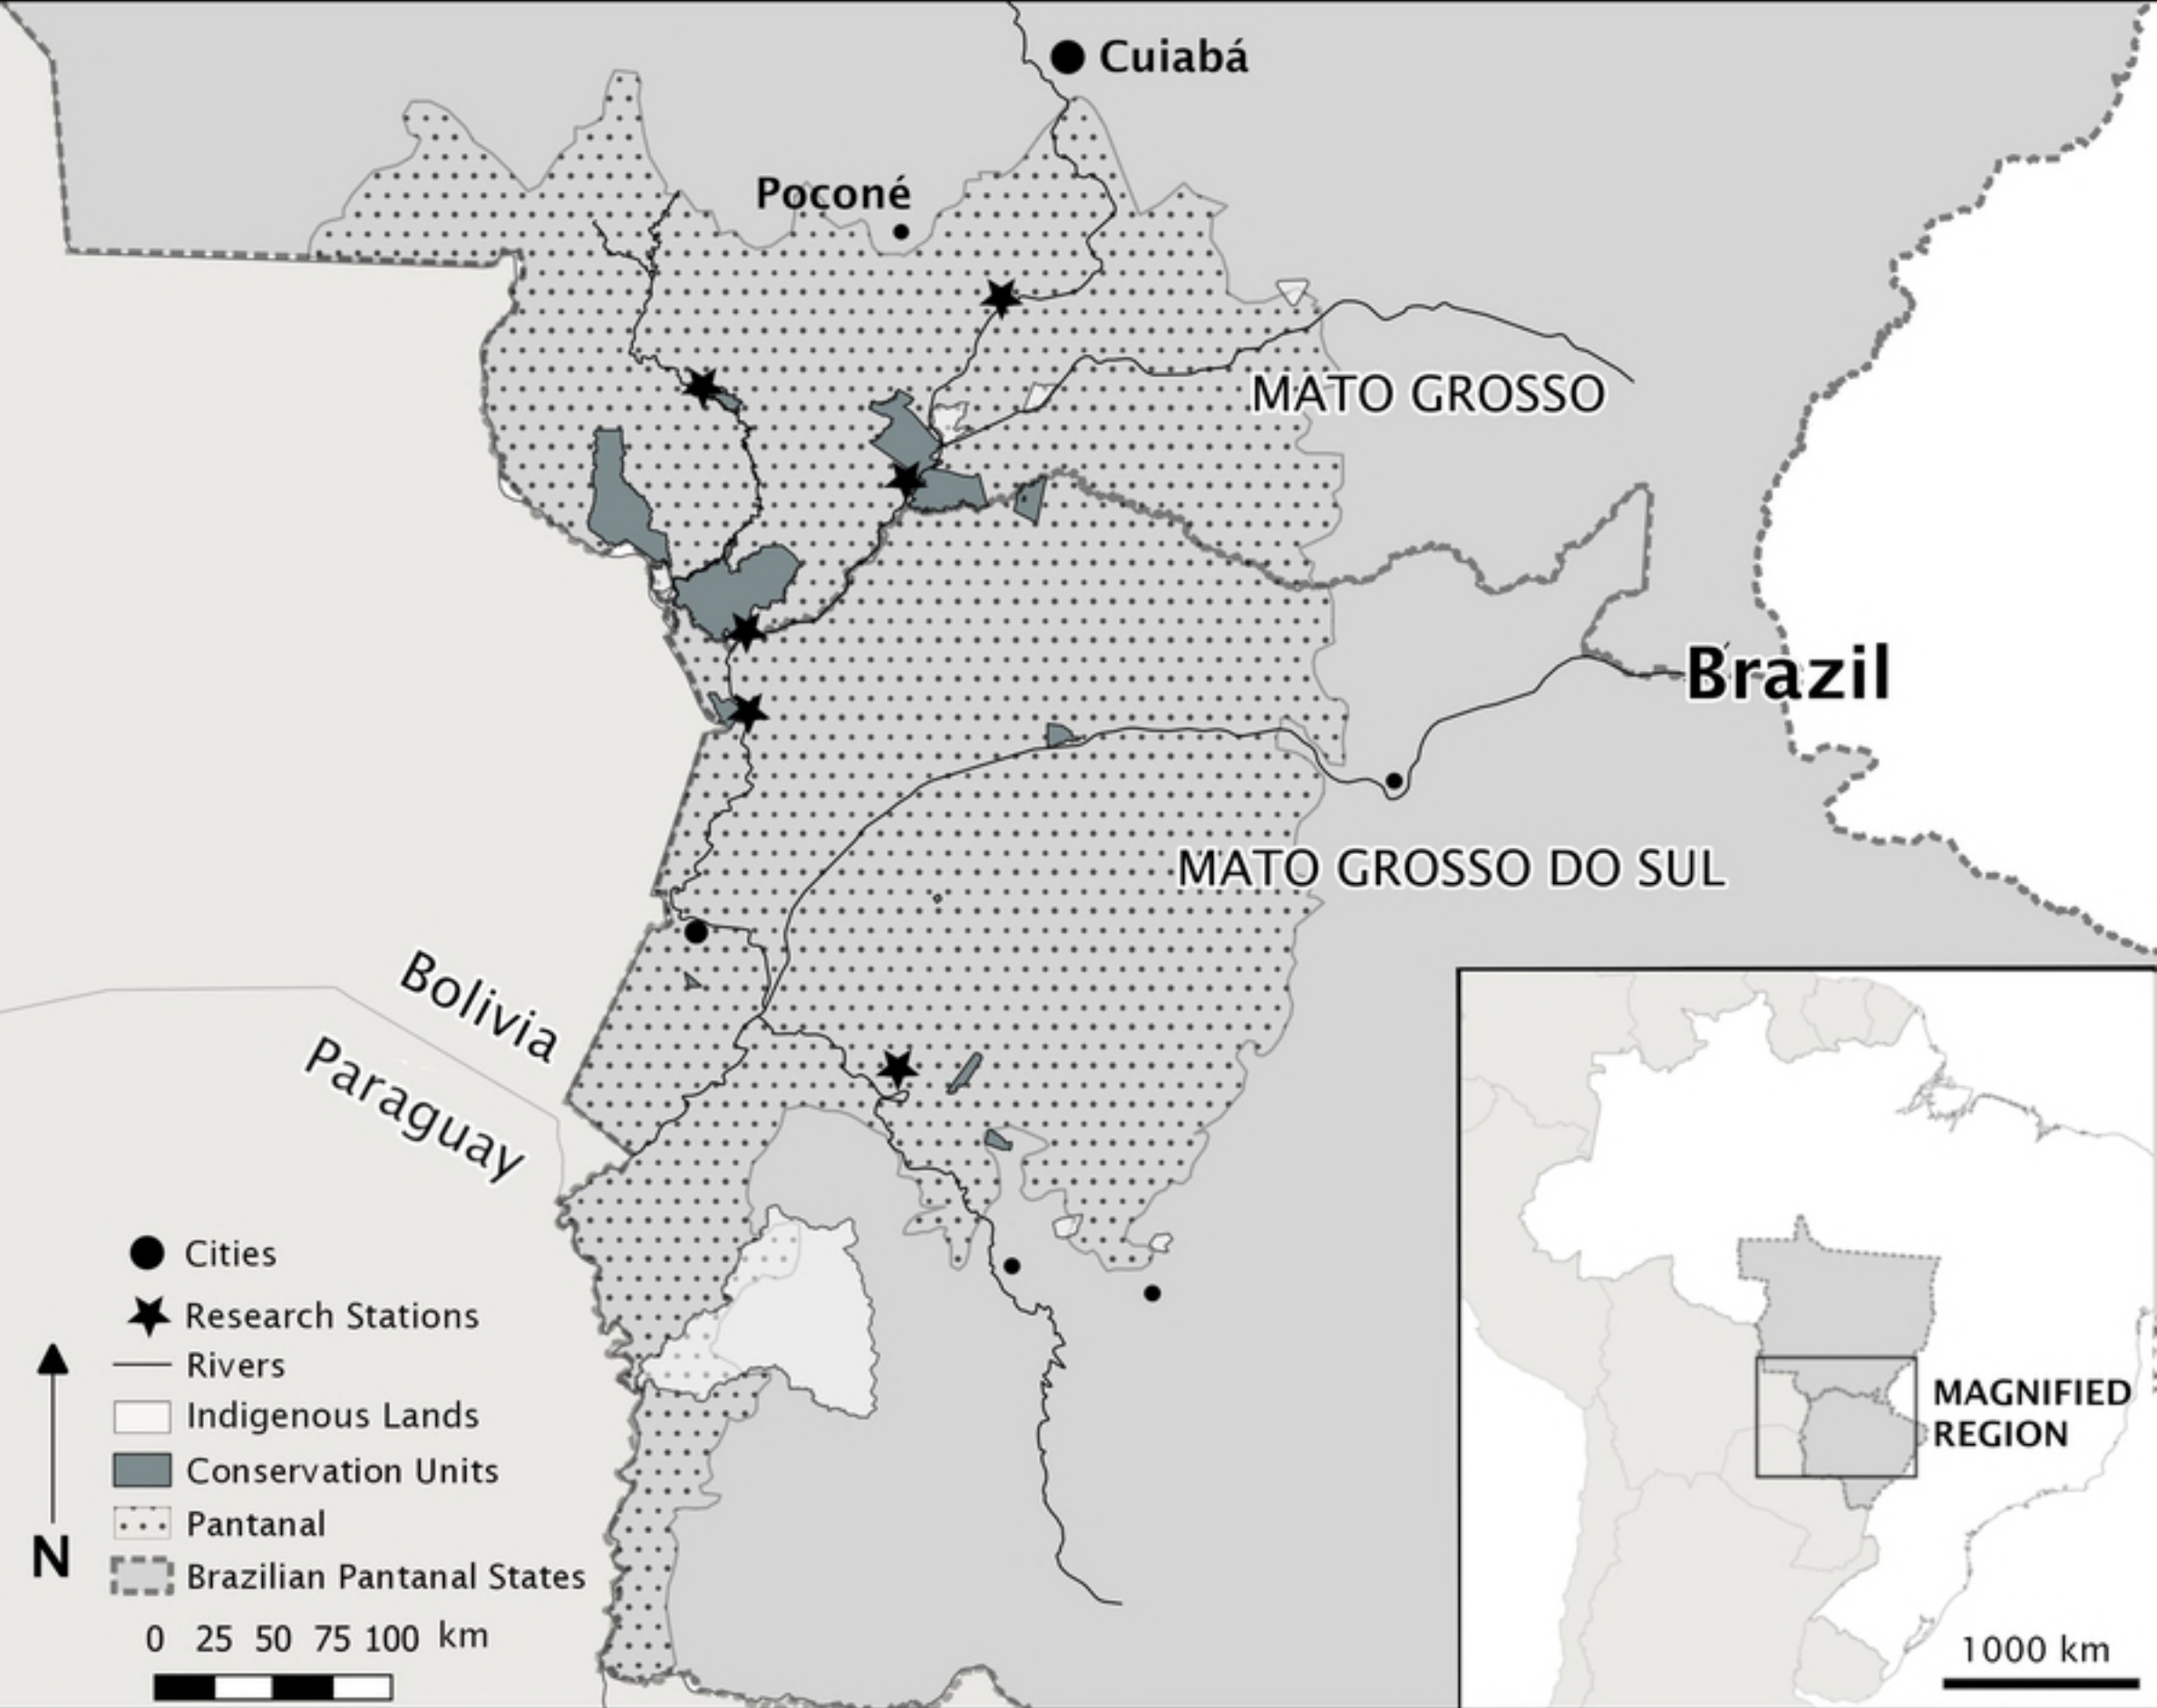

Figure 1
